# Supplementary material
Source: Research Square preprint supplement (doi:10.21203/rs.3.rs-9431139/v1)
Supplement: Supplementary file 1 [file 2a5e0173ba549b99300b457e.docx]

**Appendix C: War Exposure Questionnaire (WEQ)**

**Instructions:** Please indicate how often you experienced each of the following during the war/conflict period. Use the scale from 1 (Never) to 5 (Very Much).

| **No.** | **Item** | Scale |
| --- | --- | --- |
| 1 | Did you hear the sound of explosions or air raid sirens? | 1–5 (Never to Very Much) |
| 2 | Did you feel shockwaves from explosions or ground tremors? | 1–5 |
| 3 | Did you see missile interceptions or sparks in the sky? | 1–5 |
| 4 | Were you forced to go to a shelter or safe room? | 1–5 |
| 5 | Were you separated from your family due to the crisis? | 1–5 |
| 6 | Did you experience disruption in your daily routine (work, study, sleep)? | 1–5 |
| 7 | Were your classes held online? | 1–5 |
| 8 | Did you have problems accessing internet or electricity? | 1–5 |
| 9 | Did you witness or hear about an acquaintance being injured or killed? | 1–5 |
| 10 | How many hours per day did you follow war-related news? | 0 = None, 1 = Less than 1 hour, 2 = 1–3 hours, 3 = More than 3 hours |

**Scoring:** Items 1–9 are scored on a 5-point Likert scale. Item 10 uses a 4-point ordinal scale measuring media exposure duration.
