# Supplementary material
Source: Research Square preprint supplement (doi:10.21203/rs.3.rs-9431139/v1)
Supplement: Supplementary file 2 [file 49528e9c76aa9bec044477a5.docx]

**Appendix D: Detailed instructions for cognitive tasks**

**D1. N‑back task (2‑back) – a standard working memory task**

**Task description:**

We used a standard 2‑back working memory task. Participants viewed a sequence of consonants presented one at a time in the centre of a computer screen. Each letter appeared for 500 ms, followed by a blank screen (inter‑stimulus interval) of 1500 ms. Participants were instructed to press the space bar as quickly and accurately as possible whenever the current letter matched the letter presented **two trials earlier**.

**Parameters (chosen based on common practice in the literature, adapted for this study):**

- Total trials: 60
- Targets (match trials): 30 (50%)
- Stimuli: consonants (B, C, D, F, G, H, J, K, L, M, N, P, Q, R, S, T, V, W, X, Z) – vowels excluded to reduce verbal rehearsal.
- Practice: 10 practice trials (not included in the main task)
- Outcome measure: d‑prime (sensitivity) = z(hit rate) – z(false alarm rate)

**Instructions presented to participants (verbatim):**

*“You will see a series of letters on the screen, one after another. Your job is to press the SPACE BAR whenever the letter on the screen is the SAME as the letter you saw TWO letters ago. Try to be as fast and accurate as possible. If you make a mistake, just keep going. Do you have any questions?”*

**Scoring:**

- **Hit:** Correctly pressing the space bar on a target trial.
- **False alarm:** Pressing the space bar on a non‑target trial.
- **d‑prime:** Higher values indicate better working memory performance.

**D2. Sustained Attention to Response Task (SART) – a standard sustained attention task**

**Task description:**

We used a standard Sustained Attention to Response Task (SART). Digits from 1 to 9 appeared sequentially in the centre of the screen. Each digit was presented for 250 ms, followed by a mask (a circle with a cross) for 900 ms. Participants were instructed to press a key (the “/” key) for every digit **except** the digit 3 (the no‑go target). No‑go trials required withholding a response.

**Parameters (chosen based on common practice in the literature, adapted for this study):**

- Total trials: 225
- No‑go trials (digit 3): 25% (56 trials)
- Go trials (digits 1, 2, 4, 5, 6, 7, 8, 9): 75% (169 trials)
- Order: pseudo‑randomised, with no more than three consecutive no‑go trials.
- No practice block (the task began directly)
- Outcome measures:
  - **Omission errors** (failing to respond to a go trial) – primary outcome as used in the paper.
  - **Commission errors** (responding to a no‑go trial) – secondary.

**Instructions presented to participants (verbatim):**

*“You will see numbers from 1 to 9 on the screen, one after another. Your job is to press the ‘/’ key for EVERY number EXCEPT the number 3. When you see the number 3, DO NOT press anything. Try to be as fast and accurate as possible. Keep your eyes on the screen at all times.”*

**Scoring:**

- **Omission error:** Failing to press the key for a go trial (digit other than 3). Higher scores indicate worse sustained attention.
- **Commission error:** Pressing the key for a no‑go trial (digit 3). Higher scores indicate worse impulse control.

**Note to readers**

The N‑back and SART tasks are standard paradigms in cognitive neuroscience. The specific parameters (stimulus duration, inter‑stimulus interval, number of trials, etc.) were chosen based on common practice in the literature and adapted for the specific context of this study. Detailed task instructions are provided here as they were presented to participants.
