# Supplementary material
Source: Research Square preprint supplement (doi:10.21203/rs.3.rs-9431139/v1)
Supplement: Supplementary file 3 [file 6bc1f94385006971b0cd5b57.docx]

**Demographic questionnaire**

**Instruction to participants:**

Please answer the following questions about yourself. Your responses will be kept confidential and used only for research purposes.

| Item | Question | Response options |
| --- | --- | --- |
| 1 | Age (in years) | _____ (open) |
| 2 | Gender | ☐ Male ☐ Female |
| 3 | Marital status | ☐ Single ☐ Married ☐ Divorced ☐ Widowed |
| 4 | Year of study | ☐ 1st year ☐ 2nd year ☐ 3rd year ☐ 4th year or higher |
| 5 | University name | _____ (open) |
| 6 | Monthly family income (million IRR) | ☐ <10 ☐ 10–20 ☐ 21–30 ☐ 31–40 ☐ >40 |
| 7 | Previous semester GPA (out of 20) | _____ (open, e.g., 16.2) |
| 8 | Do you have a history of prior trauma or mental health diagnosis? | ☐ Yes ☐ No (if yes, please specify: _____) |
| 9 | Hours of sleep per night (typical, before the war) | _____ (hours) |
| 10 | Hours of sleep per night (during the war) | _____ (hours) |

**Note to readers:**

This questionnaire was developed by the authors to collect demographic and background information relevant to the study. Items 1–7 correspond to the baseline characteristics reported in Table 1 of the main paper. Items 8–10 were used for exploratory analyses (sleep disruption and prior trauma).
