# Supplementary material
Source: Research Square preprint supplement (doi:10.21203/rs.3.rs-9431139/v1)
Supplement: Supplementary file 4 [file b37889961a6e627f740f1882.docx]

**Informed Consent Form**

**Study Title:** Cognitive scars of war: a natural experiment on student learning during the June 2025 Iran‑Israel conflict

**Principal Investigator:** Esmaeil Jafari, Associate Professor at Shahid Beheshti University

**Contact Information:** es.jafari@mail.sbu.ac.ir

**Purpose of the study**

You are invited to participate in a research study investigating how exposure to wartime events affects cognitive functions such as memory, attention, and metacognitive skills. This study has been approved by the Ethics Committee of Shahid Beheshti University (Ref: EDU‑2025‑089).

**Procedures**

If you agree to participate, you will be asked to:

1. Complete a computerised cognitive battery (N‑back and SART tasks) – approximately 10 minutes.
2. Fill out several questionnaires (Metacognitive Awareness Inventory, PTSD Checklist, war exposure questionnaire, and demographic questions) – approximately 15 minutes.
3. Provide permission for the research team to access your course examination scores and previous semester GPA from university records.

Data collection will occur at three time points: before the war, two weeks after the war, and six months later.

**Risks and benefits**

There are no direct benefits to you. Some questions may cause mild emotional discomfort, especially those related to war experiences or trauma. You may skip any question or withdraw from the study at any time without penalty. If you experience distress, you may contact university counselling services (contact information provided separately).

**Confidentiality**

All data will be anonymised. Your name and any identifying information will be removed and replaced with a unique code. Anonymised data may be shared with other researchers or deposited in a public repository (Open Science Framework) upon publication, as required by the journal. Your identity will never appear in any publication or presentation.

**Voluntary participation and withdrawal**

Your participation is completely voluntary. Refusing to participate or withdrawing at any time will not affect your grades, academic standing, or relationship with the university. You may withdraw by contacting the principal investigator, and any data collected from you up to that point will be deleted upon request.

**Contact for questions**

If you have any questions about the study, please contact Esmaeil Jafari at es.jafari@mail.sbu.ac.ir. If you have concerns about your rights as a research participant, you may contact the Ethics Committee of Shahid Beheshti University.

**Consent statement**

I have read and understood the above information. I have had the opportunity to ask questions and have received satisfactory answers. I voluntarily agree to participate in this study.

**Participant signature:** _________________ **Date:** _____________

**Participant name (printed):** _________________

**Researcher signature:** _________________ **Date:** _____________

**Researcher name (printed):** Esmaeil Jafari
